# Supplementary material
Source: Research Square preprint supplement (doi:10.21203/rs.3.rs-9178733/v1)
Supplement: Supplementary file 1 [file 767f413d6a30d0cfc619238e.docx]

**Trial Protocol
Habitual Caffeine Intake Affects the Ergogenicity of Different Coffee Dosing Regimens on Muscular Endurance, Sprint, and Cognitive Performance in Men and Women**

# 1. Background and Rationale

Caffeine is one of the most widely used ergogenic aids in sport and exercise performance. Numerous studies have demonstrated that caffeine ingestion can improve muscular endurance, power output, and cognitive performance through mechanisms including adenosine receptor antagonism, enhanced neurotransmitter release, and increased motor unit recruitment.

Despite extensive literature on caffeine supplementation, an important unresolved question is whether habitual caffeine intake influences the ergogenic response to acute caffeine ingestion. Chronic caffeine intake may upregulate adenosine receptors, potentially reducing the effectiveness of caffeine during exercise. However, previous research investigating the interaction between habitual caffeine consumption and acute caffeine supplementation has produced conflicting results.

Another limitation in existing literature is the underrepresentation of female participants, particularly in studies examining caffeine ergogenicity. Moreover, most studies have focused on isolated performance outcomes rather than examining multiple performance domains such as strength, sprint power, and cognitive function within the same experimental protocol.

Therefore, this study aimed to investigate the effects of three doses of caffeine delivered via coffee (1.5, 3, and 6 mg·kg⁻¹) on muscular strength, muscular endurance, sprint performance, and cognitive performance in men and women with different levels of habitual caffeine consumption.

# 2. Objectives

Primary Objective:
To determine whether habitual caffeine intake influences the ergogenic effects of different caffeine doses on muscular endurance.

Secondary Objectives:
1. To determine the effects of different caffeine doses on maximal muscular strength, sprint power output, and cognitive performance.
2. To examine whether these effects differ between sexes and habitual caffeine consumption groups.

# 3. Trial Design

This study used a randomized, double-blind, placebo-controlled crossover design.

Participants attended five laboratory visits:
1. Screening and familiarization visit
2. Four experimental trials

During the experimental visits participants consumed one of four treatments:
- Placebo (decaffeinated coffee)
- 1.5 mg·kg⁻¹ caffeine
- 3 mg·kg⁻¹ caffeine
- 6 mg·kg⁻¹ caffeine

Treatments were administered in randomized order with a minimum 72-hour washout period between trials.

Participants were grouped according to habitual caffeine intake:
- Low intake (≤100 mg/day)
- Moderate intake (100–300 mg/day)
- High intake (≥300 mg/day)

# 4. Study Setting

The study was conducted in a controlled exercise physiology laboratory environment within the Faculty of Sport Sciences. All exercise testing and data collection occurred under standardized laboratory conditions.

# 5. Participants

Inclusion Criteria:
- Healthy men or women aged 18–30 years
- Physically active individuals
- ≥2 years resistance training experience
- Regular squat and bench press training
- Ability to squat ≥125% body mass and bench press ≥100% body mass
- Written informed consent

Exclusion Criteria:
- Cardiovascular, metabolic, or neurological disease
- Musculoskeletal injury within the previous 3 months
- Use of ergogenic supplements affecting performance
- Use of anabolic steroids
- Smoking
- Known caffeine hypersensitivity

# 6. Sample Size

A priori power analysis using G*Power (v3.1) determined that 66 participants were required to detect a within-between interaction in repeated-measures ANOVA with an effect size of f = 0.20, alpha level of 0.05, and statistical power of 80%. To ensure adequate statistical power, 69 participants were recruited.

# 7. Randomization and Blinding

Participants were randomly assigned to the order of caffeine conditions using simple randomization. Randomization and beverage preparation were performed by an independent technician not involved in the study procedures. Both participants and investigators were blinded to treatment allocation.

# 8. Intervention

Participants consumed coffee containing one of four caffeine doses:
- Placebo (decaffeinated coffee)
- 1.5 mg·kg⁻¹ caffeine
- 3 mg·kg⁻¹ caffeine
- 6 mg·kg⁻¹ caffeine

Coffee used: Nescafe Gold instant coffee (36 mg caffeine per gram).

Coffee was prepared in 600 mL hot water (~65°C). Participants consumed the beverage within 10 minutes. Testing began 60 minutes after ingestion.

# 9. Study Procedures

Pre-trial standardization:
Participants fasted overnight for 10 hours and avoided alcohol and vigorous physical activity for 24 hours prior to each trial. Participants also replicated the same dietary intake before each trial.

Cognitive Performance Test:
A modified Arrow Flanker Task assessed reaction time and response accuracy. Participants completed 20 practice trials followed by 100 experimental trials.

Strength and Muscular Endurance Tests:
Maximum dynamic strength was assessed using 1RM squat and bench press tests. Muscular endurance was evaluated using repetitions to failure at 60% of 1RM with standardized tempo.

Sprint Performance:
Sprint performance was assessed using a 15-second Wingate anaerobic test on a cycle ergometer with resistance set to 7.5% body mass.

Physiological Measures:
Heart rate and ratings of perceived exertion (RPE) were recorded during the testing sessions.

# 10. Outcome Measures

Primary Outcome:
Lower-body muscular endurance performance.

Secondary Outcomes:
- Maximal strength (1RM squat and bench press)
- Bench press muscular endurance
- Peak and mean sprint power
- Cognitive performance (reaction time and accuracy)
- Heart rate
- Ratings of perceived exertion

# 11. Statistical Analysis

Statistical analyses were performed using SPSS version 23.0. Data are presented as mean ± SD. A mixed-design ANOVA was used to examine the effects of sex, habitual caffeine intake, treatment condition, and time. Bonferroni corrections were applied for post-hoc comparisons. Statistical significance was set at p < 0.05. Effect sizes were calculated using partial eta squared (ηp²).

# 12. Ethical Considerations

The study was approved by the Institutional Review Board of Ankara University (Reference No: İ3-149-20) and conducted in accordance with the Declaration of Helsinki. Participants provided written informed consent prior to participation.

# 13. Data Management

All participant data were anonymized and stored securely. Data supporting the findings of this study are available from the corresponding author upon reasonable request.

# 14. Dissemination Plan

The findings of this study will be disseminated through peer-reviewed publications, scientific conferences, and presentations to the sport science community.

# 15. Trial Registration

The study was registered at ClinicalTrials.gov (Registration ID: NCT07474753; registration date: 11 March 2026).
